# Supplementary material
Source: PubMed Central journal article supplement (PMC4563754)
Supplement: JCI80911sd.pdf [file JCI80911sd.pdf]

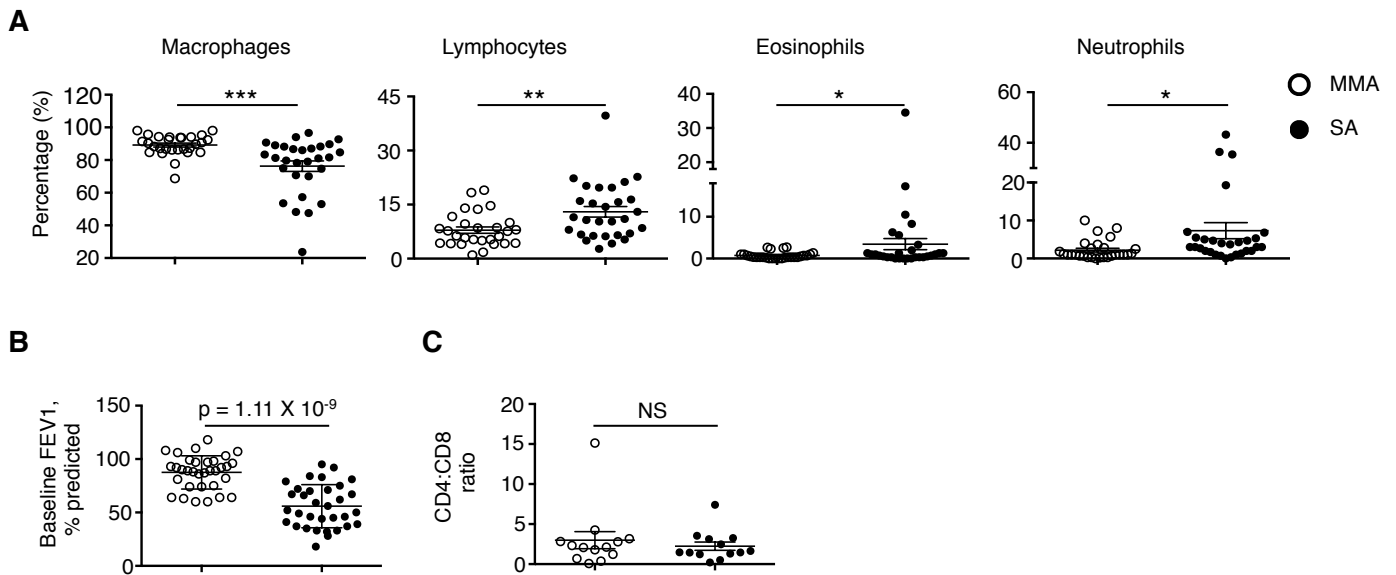

**Supplemental Figure 1.** Cellular infiltrate in the airway lumen, FEV1 and IFN-g mRNA expression in human asthma subjects. **(A)** Differential cell counts in BAL fluid of subjects with MMA and SA;  $n = 28$  and  $29$  for MMA and SA, respectively. **(B)** Baseline FEV1% predicted for MM and SA subjects;  $n = 33$  each for MMA and SA. **(C)** Ratio of CD4+ and CD8+ T cell percentages in the BAL fluid of MMA and SA subjects;  $n = 13$  each for MMA and SA. For **(A-C)**, \*  $p \leq 0.05$ , \*\*  $p \leq 0.01$ , \*\*\*  $p \leq 0.001$ , NS – not significant by Mann-Whitney test.

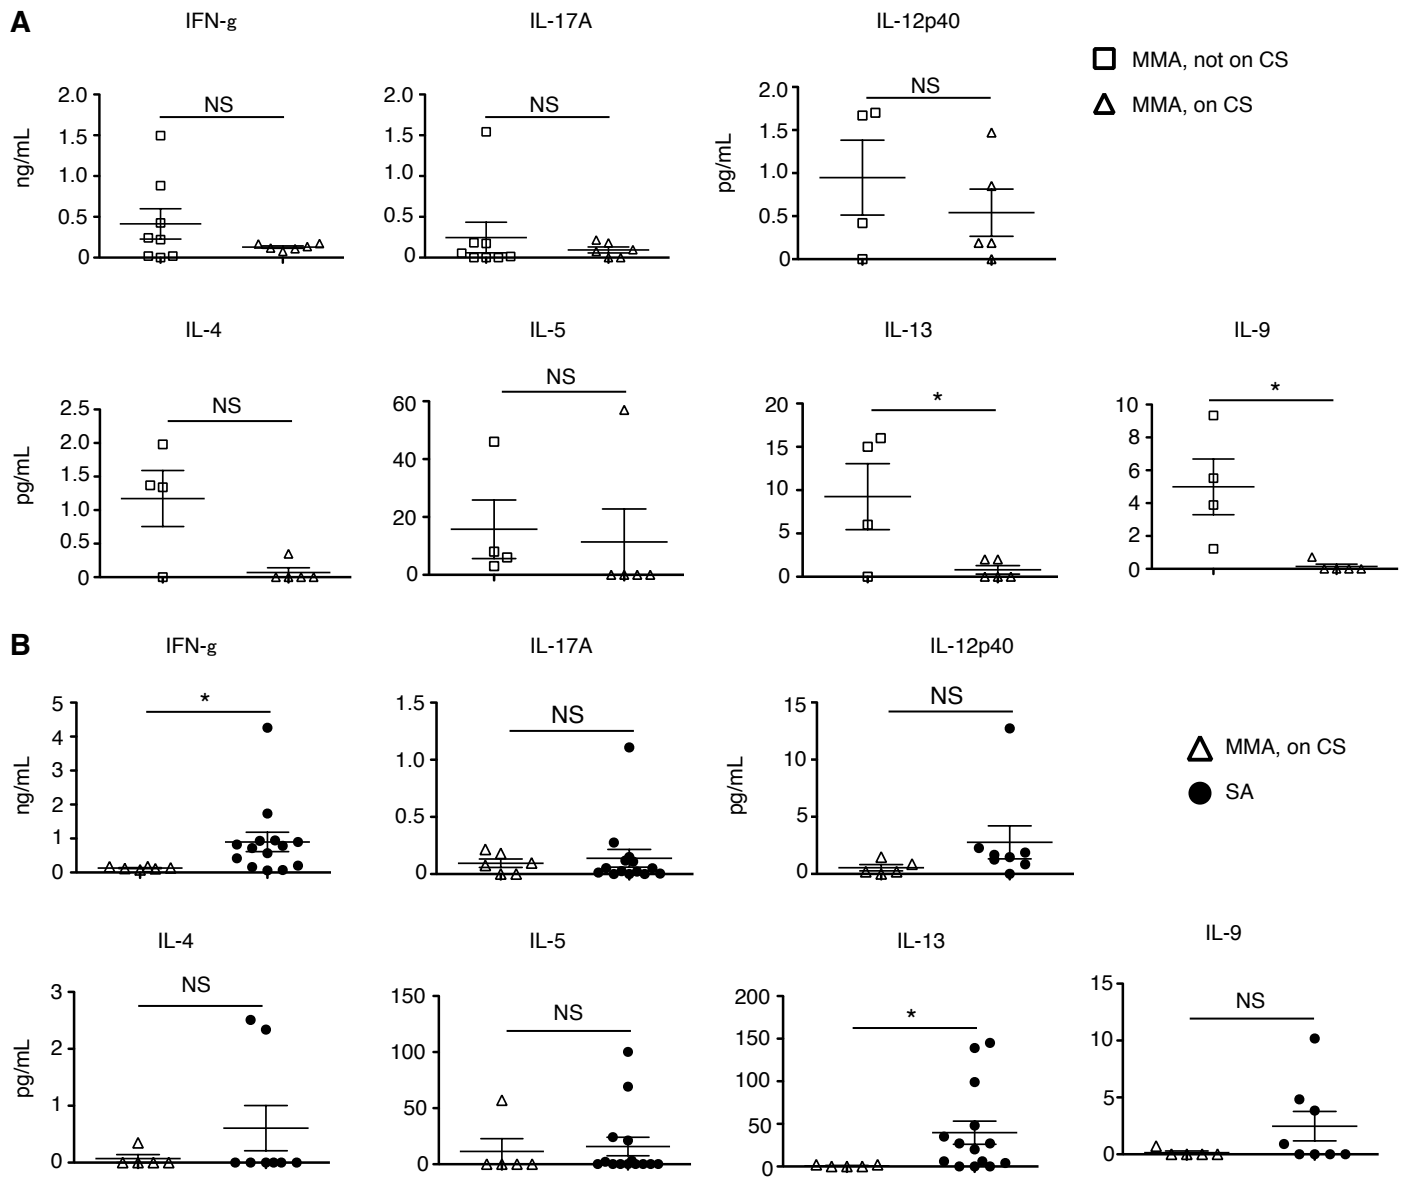

**Supplemental Figure 2. (A)** Concentration of indicated cytokines in culture supernatants of BAL cells from MMA subjects treated with or without corticosteroid therapy.; n = 6 and 8 for MMA with or without CS therapy, respectively, for IFN-g and IL-17A and n = 5 and 4 for MMA with or without CS therapy, respectively for IL-4, IL-5, IL-9, IL-12p40 and IL-13. **(B)** Concentration of indicated cytokines in supernatants of *ex vivo* cultured BAL cells from MMA patients on CS therapy and severe asthma patients. n = 5-6 and 14 for MMA + CS and SA, respectively, for IFN-g, IL-17A, IL-5 and IL-13 estimation, n = 5 and 8 for MMA + CS and SA, respectively, for IL-4, IL-9 and IL-12p40 estimation. For **(A-B)**, \* p ≤ 0.05, NS – non-significant using Mann-Whitney test.

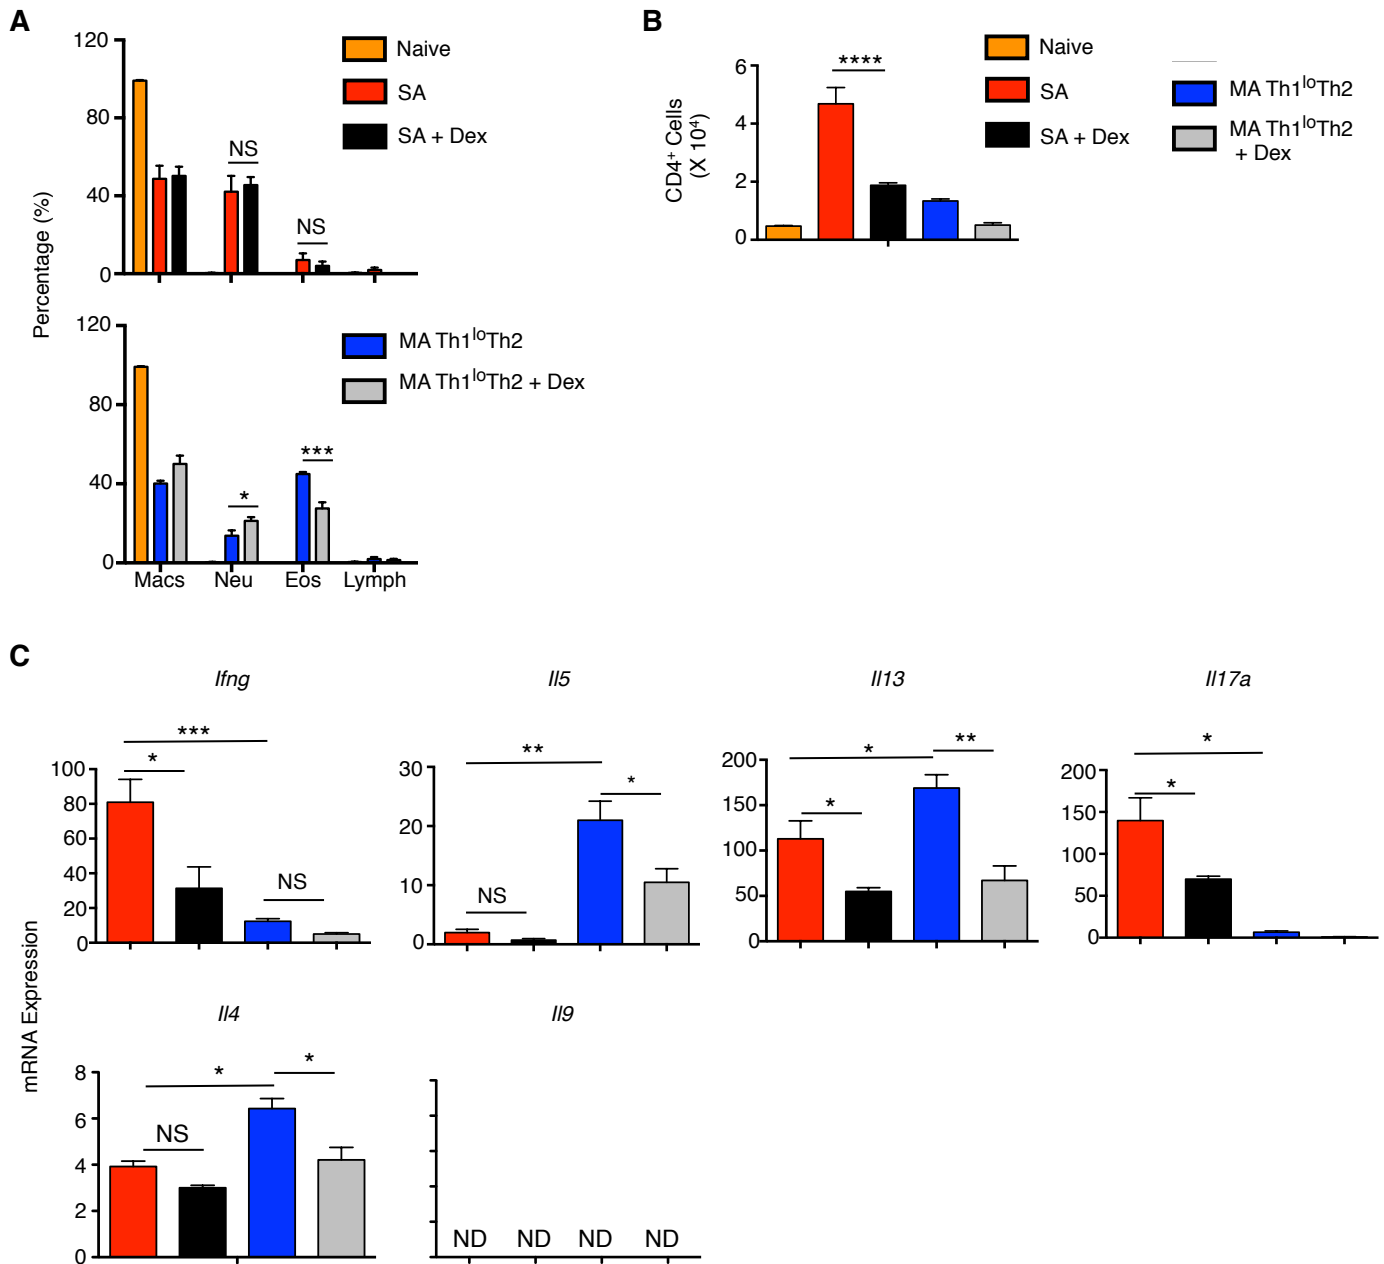

**Supplemental Figure 3.** Cellular infiltrate in the airway lumen and cytokine mRNA expression in mouse asthma models. **(A)** Percentages of cell types in BAL fluid of mice sensitized and challenged in SA and MA Th1<sup>lo</sup>Th2 models ± Dex. \*  $p \leq 0.05$ , \*\*\*  $p \leq 0.001$ , NS – non-significant using Student's unpaired t-test **(B)** Total lung CD4<sup>+</sup> T cell numbers in mice sensitized and challenged in SA and MA Th1<sup>lo</sup>Th2 models ± Dex quantified by flow cytometry. \*\*\*\*  $p \leq 0.0001$  using One-way ANOVA with Tukey's post-hoc test. **(C)** Cytokine mRNA expression in whole lungs of mice sensitized and challenged in SA and MA Th1<sup>lo</sup>Th2 models ± Dex. ND – not detected. \*  $p \leq 0.05$ , \*\*  $p \leq 0.01$ , \*\*\*  $p \leq 0.001$ , NS – not significant using One-way ANOVA with Tukey's post-hoc test. Data shown are mean ± s.e.m and representative of 2-3 independent experiments with  $n = 3-4$  mice per group.

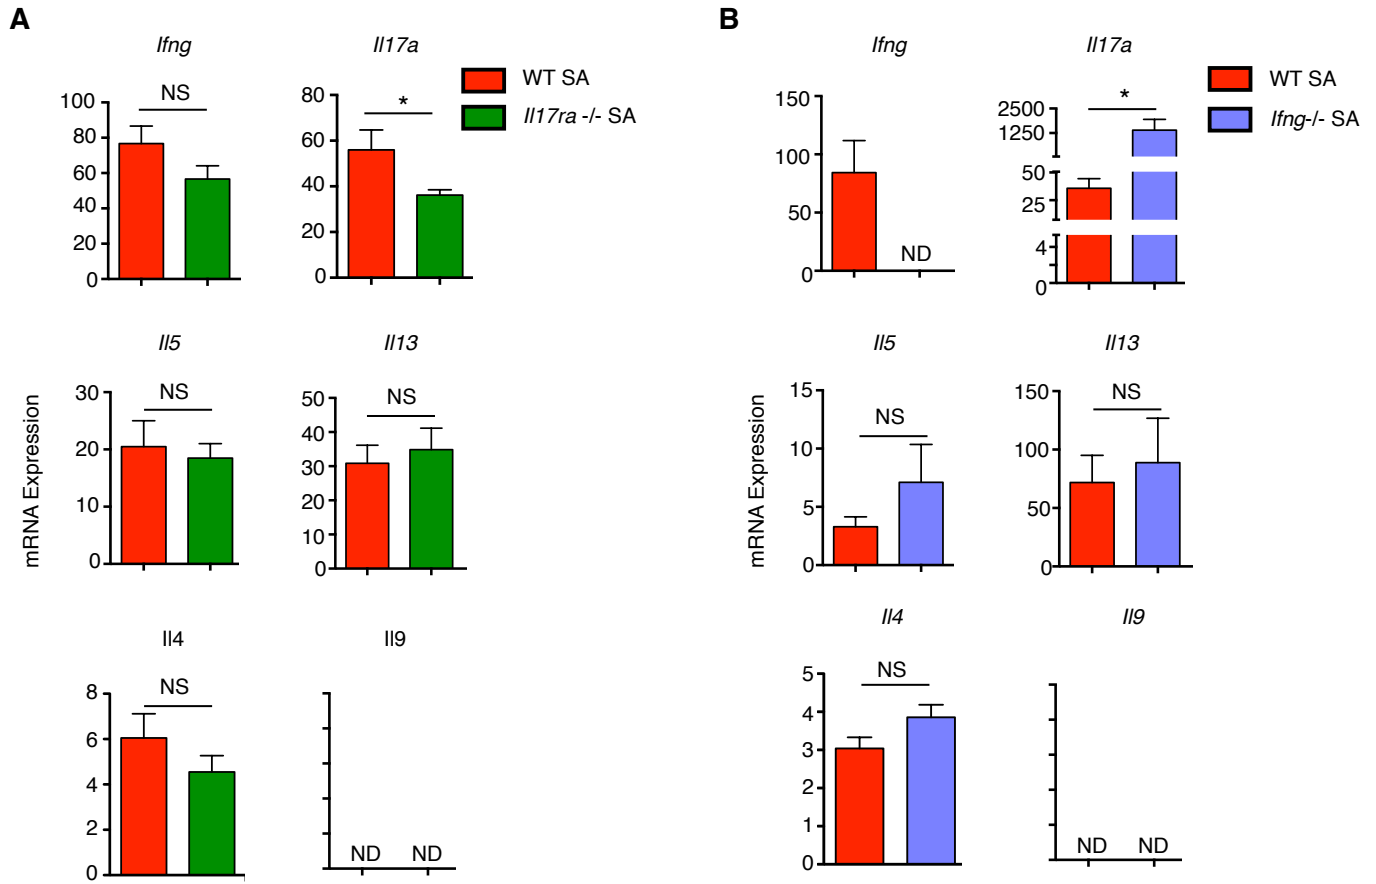

**Supplemental Figure 4.** Cytokine mRNA expression in WT, *Il17ra*<sup>-/-</sup> and *Ifng*<sup>-/-</sup> mice subjected to the SA model. Mice were subjected to the SA Model and analyzed 24 h after the final allergen challenge. **(A)** Cytokine mRNA expression in whole lungs of WT and *Il17ra*<sup>-/-</sup> mice. **(B)** Cytokine mRNA expression in whole lungs of WT and *Ifng*<sup>-/-</sup> mice. For **(A-B)**, \*  $p \leq 0.05$ , NS – not significant by Student’s unpaired t-test. Data shown are mean  $\pm$  s.e.m and representative of 2-3 independent experiments with  $n = 3-4$  mice per group.

**Table 1: Airway hyperresponsiveness-related genes (IPA output)**

|               |             |                            |
|---------------|-------------|----------------------------|
| 2210013O21Rik | ICOS        | PIK3R1                     |
| ADAM12        | <b>IFNG</b> | PLAT                       |
| ADIPOQ        | IgG         | platelet activating factor |
| ALOX5         | IGHG1       | PRG2                       |
| AMBP          | IL4         | PRMT2                      |
| arginase      | IL5         | PTAFR                      |
| C3            | IL6         | PTEN                       |
| C5            | IL9         | RAC1                       |
| C3AR1         | IL10        | Ras                        |
| C5AR1         | IL13        | RIPK2                      |
| C5AR2         | IL18        | RORC                       |
| CARD11        | IL22        | RUNX3                      |
| CAT           | IL25        | <b>SLPI</b>                |
| CCL2          | IL27        | SMAD3                      |
| Ccl2          | IL13RA2     | SOCS3                      |
| CCL11         | IL15RA      | SPI1                       |
| CCL17         | IL17A       | SPON2                      |
| CCL22         | IL17B       | SPRED1                     |
| CCL28         | IL17RA      | STAT3                      |
| CCL3L3        | IL1RL1      | STAT4                      |
| CCR3          | IL1RN       | STAT6                      |
| CD44          | IL27RA      | TACR1                      |
| CD86          | IL2RB       | TBX21                      |
| CD1D          | IL4R        | Tgf beta                   |
| CD300LF       | IL6R        | TICAM1                     |
| CDH13         | ITK         | TLR4                       |
| CHD4          | KIT         | TNF                        |
| CLCA1         | LAMA2       | TNFAIP6                    |
| CMA1          | LGALS3      | TNFRSF4                    |
| CX3CR1        | LTA         | TNFRSF9                    |
| CXCL12        | LTB4R       | TNFRSF1A                   |
| CXCR4         | LTC4S       | TPSG1                      |
| DLL4          | MAPK3       | TRAF3IP2                   |
| F2RL1         | MGAT5       | Traj18                     |
| FLT3LG        | mir-1       | TSLP                       |
| GATA3         | MYD88       | U0126                      |
| GGT5          | NFE2L2      | VDR                        |
| HAS2          | Nos         | VEGFA                      |
| HGF           | NRTN        |                            |
| HRAS          | PIK3CD      |                            |

**Table 1.** List of AHR-related genes identified using Ingenuity Knowledge Base (IKB) Diseases and Functions search bar from the IPA software.

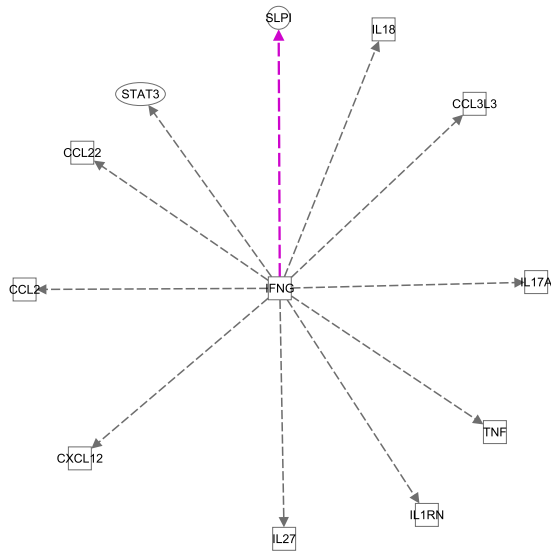

**Supplemental Figure 5.** IFN- $\gamma$ -regulated AHR-related genes expressed in structural cells of the lung identified using IPKB. Using IPA's Build function, AHR-related genes shown in Table 1 were specifically selected for genes expressed in the lung, epithelial cells and smooth muscle cells. Genes from this reduced set were further tested for regulation by IFN-g $\gamma$  in the lung using Path Explorer function.

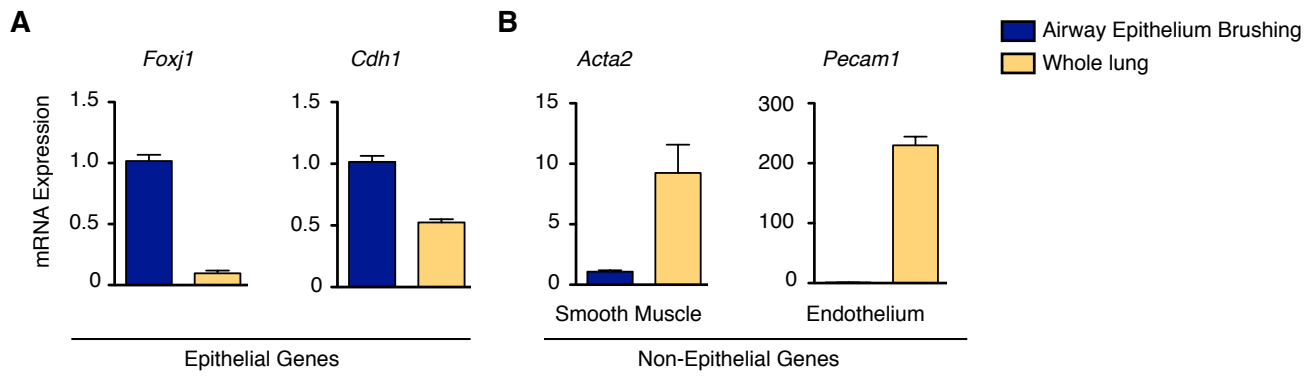

**Supplemental Figure 6.** Characterization of mouse airway epithelial cell brushings. qRT-PCR analysis of expression of **(A)** Epithelial-specific genes and **(B)** non-epithelial genes in whole lung and brush-harvested samples. Data shown are mean  $\pm$  s.e.m and representative of 3 independent experiments with n = 3-4 mice per group.

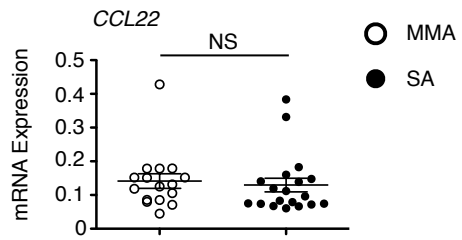

**Supplemental Figure 7.** *Ccl22* mRNA expression analyzed by qRT-PCR in epithelial brushings of MMA and SA subjects; n = 16 and 19 for MMA and SA, respectively. NS – non-significant, Mann-Whitney test.



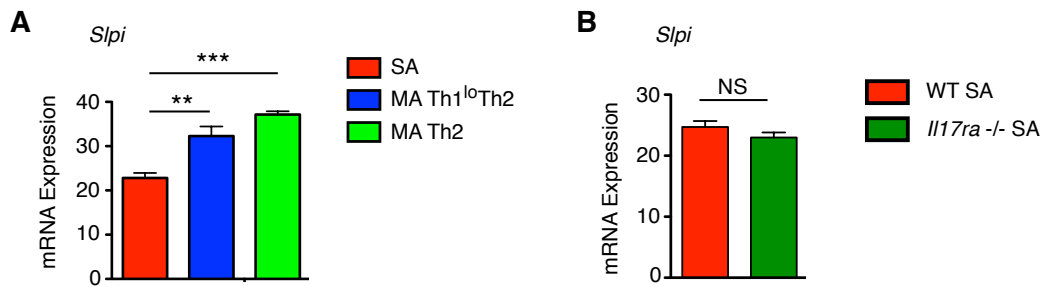

**Supplemental Figure 8.** SLPI mRNA expression in different models of asthma. **(A)** SLPI mRNA expression in airway epithelial brushings from mice subjected to the SA, MA Th1<sup>lo</sup>Th2 and MA Th2 asthma models. \*\* p ≤ 0.01, \*\*\* p ≤ 0.001 using One-way ANOVA with Tukey's post-hoc test. **(B)** SLPI mRNA expression in airway epithelial brushings of WT and *Il17ra*<sup>-/-</sup> mice subjected to the severe asthma model. NS – not significant by Student's unpaired t-test. For **(A-B)**, data shown are mean ± s.e.m and representative of 2-3 independent experiments with n = 3-4 mice per group.

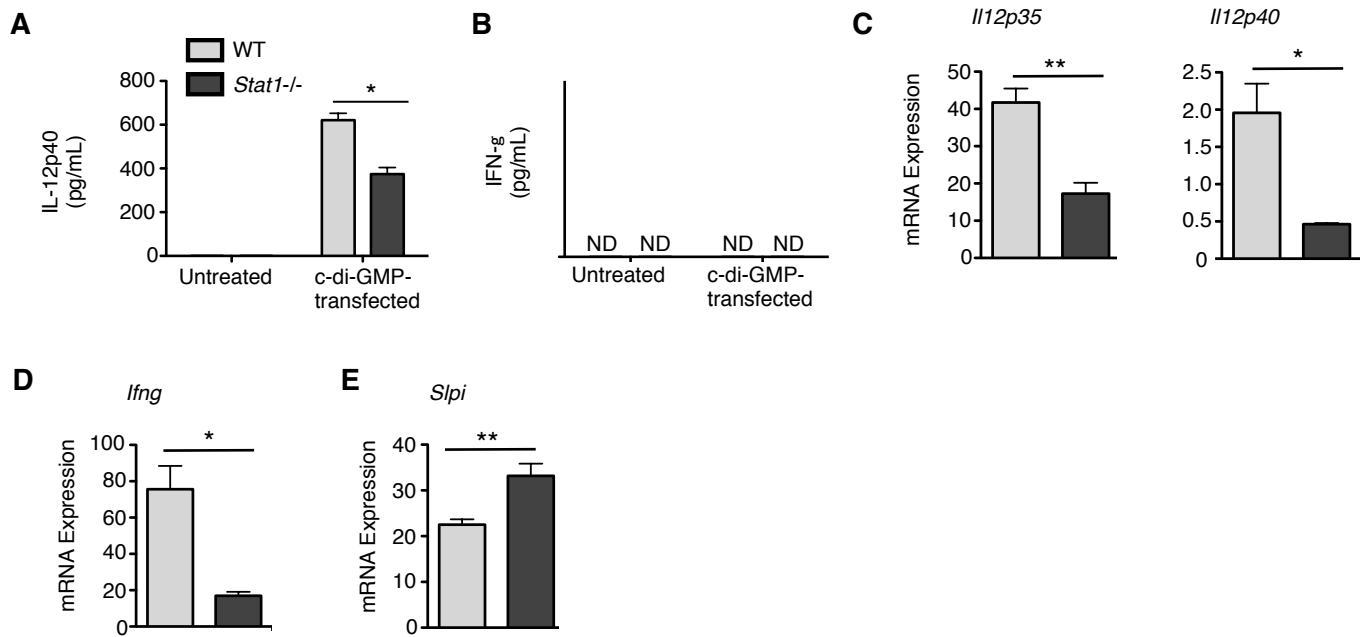

**Supplemental Figure 9.** c-di-GMP regulation of IFN-g production via IL-12 induction is dependent on STAT1. **(A)** IL-12p40 and **(B)** IFN-g concentrations in culture supernatants of WT and *Stat1*<sup>-/-</sup> BMDMs transfected with c-di-GMP. **(C)** *Il12p35* and *Il12p40* mRNA expression in lymph nodes of WT and *Stat1*<sup>-/-</sup> sensitized in the severe asthma model. **(D)** *Ifng* mRNA expression in whole lungs of WT and *Stat1*<sup>-/-</sup> mice sensitized and challenged in the severe asthma model. **(E)** *Slpi* mRNA expression in airway epithelial brushings from WT and *Stat1*<sup>-/-</sup> mice sensitized and challenged in the severe asthma model. For **(A-E)** \*  $p \leq 0.05$ , \*\*  $p \leq 0.01$  using Student's unpaired t-test. Data shown are mean  $\pm$  s.e.m and representative of 2 independent experiments with  $n = 3-4$  mice per group.
